# Supplementary material for: Do the body mass index and the diagnosis of gestational diabetes mellitus influence the level of physical activity during pregnancy and postpartum?
Source: PubMed Central journal article supplement (PMC6688803; doi:10.1371/journal.pone.0220947), 2019-08-09
Supplement: pone.0220947.s002.pdf [file pone.0220947.s002.pdf]

# Questionário de Atividade Física para Gestantes – QAFG

É muito importante que você responda honestamente. Não há nenhuma resposta certa ou errada.

1. Qual foi o dia de sua última menstruação? \_\_\_\_/\_\_\_\_/\_\_\_\_ Eu não sei. Aproximadamente.

2. Quando o seu bebê vai nascer? \_\_\_\_/\_\_\_\_/\_\_\_\_  Eu não sei.

## Quando você NÃO está no trabalho, quanto tempo, você geralmente passa:

3 Preparando as refeições (cozinhando, colocando a mesa, lavando os pratos).

| DATAS |  |                                |
|-------|--|--------------------------------|
| 0     |  | Nenhum                         |
| 1     |  | Menos que 30 minutos por dia   |
| 2     |  | De 30 minutos a 1 hora por dia |
| 3     |  | De 1 hora a 2 horas por dia    |
| 4     |  | De 2 hora a 3 horas por dia    |
| 5     |  | De 3 horas ou mais por dia     |

4 Cuidando de criança (Vestindo, banhando, Alimentando enquanto você fica sentada).

| DATAS |  |                                |
|-------|--|--------------------------------|
|       |  | Nenhum                         |
|       |  | Menos que 30 minutos por dia   |
|       |  | De 30 minutos a 1 hora por dia |
|       |  | De 1 hora a 2 horas por dia    |
|       |  | De 2 hora a 3 horas por dia    |
|       |  | De 3 horas ou mais por dia     |

5 Cuidando de criança (Vestindo, banhando, alimentando enquanto você está em pé).

|  |  |                                |
|--|--|--------------------------------|
|  |  | Nenhum                         |
|  |  | Menos que 30 minutos por dia   |
|  |  | De 30 minutos a 1 hora por dia |
|  |  | De 1 hora a 2 horas por dia    |
|  |  | De 2 hora a 3 horas por dia    |
|  |  | De 3 horas ou mais por dia     |

6 Brincando com criança enquanto você está Sentada ou em pé.

|  |  |                                |
|--|--|--------------------------------|
|  |  | Nenhum                         |
|  |  | Menos que 30 minutos por dia   |
|  |  | De 30 minutos a 1 hora por dia |
|  |  | De 1 hora a 2 horas por dia    |
|  |  | De 2 hora a 3 horas por dia    |
|  |  | De 3 horas ou mais por dia     |

7 Brincando com a criança enquanto você Está caminhando ou correndo.

|  |  |                                |
|--|--|--------------------------------|
|  |  | Nenhum                         |
|  |  | Menos que 30 minutos por dia   |
|  |  | De 30 minutos a 1 hora por dia |
|  |  | De 1 hora a 2 horas por dia    |
|  |  | De 2 hora a 3 horas por dia    |
|  |  | De 3 horas ou mais por dia     |

8 Carregando criança nos braços.

|  |  |                                |
|--|--|--------------------------------|
|  |  | Nenhum                         |
|  |  | Menos que 30 minutos por dia   |
|  |  | De 30 minutos a 1 hora por dia |
|  |  | De 1 hora a 2 horas por dia    |
|  |  | De 2 hora a 3 horas por dia    |
|  |  | De 3 horas ou mais por dia     |

9 Cuidando de idoso adulto, incapacitado.

|  |  |                                |
|--|--|--------------------------------|
|  |  | Nenhum                         |
|  |  | Menos que 30 minutos por dia   |
|  |  | De 30 minutos a 1 hora por dia |
|  |  | De 1 hora a 2 horas por dia    |
|  |  | De 2 hora a 3 horas por dia    |
|  |  | De 3 horas ou mais por dia     |

10 Sentada: usando o computador, lendo, escrevendo, ou falando ao telefone Não estando trabalhando.

|  |  |                                |
|--|--|--------------------------------|
|  |  | Nenhum                         |
|  |  | Menos que 30 minutos por dia   |
|  |  | De 30 minutos a 1 hora por dia |
|  |  | De 1 hora a 2 horas por dia    |
|  |  | De 2 hora a 3 horas por dia    |
|  |  | De 3 horas ou mais por dia     |

## Quanto tempo, você geralmente passa:

11 Assistindo TV ou vídeo.

|  |  |  |                                |
|--|--|--|--------------------------------|
|  |  |  | Nenhum                         |
|  |  |  | Menos que 30 minutos por dia   |
|  |  |  | De 30 minutos a 1 hora por dia |
|  |  |  | De 1 hora a 2 horas por dia    |
|  |  |  | De 2 hora a 3 horas por dia    |
|  |  |  | De 3 horas ou mais por dia     |

12 Brincando com animais de estimação

|  |  |  |                                |
|--|--|--|--------------------------------|
|  |  |  | Nenhum                         |
|  |  |  | Menos que 30 minutos por dia   |
|  |  |  | De 30 minutos a 1 hora por dia |
|  |  |  | De 1 hora a 2 horas por dia    |
|  |  |  | De 2 hora a 3 horas por dia    |
|  |  |  | De 3 horas ou mais por dia     |

13 Fazendo limpeza leve (arrumar as camas, Passar roupas, levar o lixo para fora)

|  |  |  |                                |
|--|--|--|--------------------------------|
|  |  |  | Nenhum                         |
|  |  |  | Menos que 30 minutos por dia   |
|  |  |  | De 30 minutos a 1 hora por dia |
|  |  |  | De 1 hora a 2 horas por dia    |
|  |  |  | De 2 hora a 3 horas por dia    |
|  |  |  | De 3 horas ou mais por dia     |

14 Fazendo compras (roupas, comidas ou outros objetos).

|  |  |  |                                |
|--|--|--|--------------------------------|
|  |  |  | Nenhum                         |
|  |  |  | Menos que 30 minutos por dia   |
|  |  |  | De 30 minutos a 1 hora por dia |
|  |  |  | De 1 hora a 2 horas por dia    |
|  |  |  | De 2 hora a 3 horas por dia    |
|  |  |  | De 3 horas ou mais por dia     |

15 Fazendo limpeza mais pesada (aspirar, varrer, esfregar o chão, lavar roupas, ou lavar janelas)

|  |  |  |                                |
|--|--|--|--------------------------------|
|  |  |  | Nenhum                         |
|  |  |  | Menos que 30 minutos por dia   |
|  |  |  | De 30 minutos a 1 hora por dia |
|  |  |  | De 1 hora a 2 horas por dia    |
|  |  |  | De 2 hora a 3 horas por dia    |
|  |  |  | De 3 horas ou mais por dia     |

16 Empurrando cortador de grama, apanhando folhas ou trabalhando no jardim.

|  |  |  |                                |
|--|--|--|--------------------------------|
|  |  |  | Nenhum                         |
|  |  |  | Menos que 30 minutos por dia   |
|  |  |  | De 30 minutos a 1 hora por dia |
|  |  |  | De 1 hora a 2 horas por dia    |
|  |  |  | De 2 hora a 3 horas por dia    |
|  |  |  | De 3 horas ou mais por dia     |

---

## Indo a lugares...

### Quanto tempo, você geralmente passa:

17 Caminhando lentamente para (pegar o ônibus, ir para trabalho ou fazer visitas)

|  |  |  |                                |
|--|--|--|--------------------------------|
|  |  |  | Nenhum                         |
|  |  |  | Menos que 30 minutos por dia   |
|  |  |  | De 30 minutos a 1 hora por dia |
|  |  |  | De 1 hora a 2 horas por dia    |
|  |  |  | De 2 hora a 3 horas por dia    |
|  |  |  | De 3 horas ou mais por dia     |

18 Caminhando rapidamente para (pegar o ônibus, ir para trabalho ou escola).

|  |  |  |                                |
|--|--|--|--------------------------------|
|  |  |  | Nenhum                         |
|  |  |  | Menos que 30 minutos por dia   |
|  |  |  | De 30 minutos a 1 hora por dia |
|  |  |  | De 1 hora a 2 horas por dia    |
|  |  |  | De 2 hora a 3 horas por dia    |
|  |  |  | De 3 horas ou mais por dia     |

19 Dirigindo, ou andando de carro ou de ônibus.

|  |  |  |                                |
|--|--|--|--------------------------------|
|  |  |  | Nenhum                         |
|  |  |  | Menos que 30 minutos por dia   |
|  |  |  | De 30 minutos a 1 hora por dia |
|  |  |  | De 1 hora a 2 horas por dia    |
|  |  |  | De 2 hora a 3 horas por dia    |
|  |  |  | De 3 horas ou mais por dia     |

## Para diversão ou exercício....

### Quanto tempo, você geralmente passa:

20 Caminhando lentamente por divertimento ou Exercício.

|  |  |  |                                |
|--|--|--|--------------------------------|
|  |  |  | Nenhum                         |
|  |  |  | Menos que 30 minutos por dia   |
|  |  |  | De 30 minutos a 1 hora por dia |
|  |  |  | De 1 hora a 2 horas por dia    |
|  |  |  | De 2 hora a 3 horas por dia    |
|  |  |  | De 3 horas ou mais por dia     |

21 Caminhando mais rápido, por divertimento ou exercício

|  |  |  |                                |
|--|--|--|--------------------------------|
|  |  |  | Nenhum                         |
|  |  |  | Menos que 30 minutos por dia   |
|  |  |  | De 30 minutos a 1 hora por dia |
|  |  |  | De 1 hora a 2 horas por dia    |
|  |  |  | De 2 hora a 3 horas por dia    |
|  |  |  | De 3 horas ou mais por dia     |

22 Caminhando mais rápido ladeira a cima, por Divertimento ou exercício.

|  |  |  |                                |
|--|--|--|--------------------------------|
|  |  |  | Nenhum                         |
|  |  |  | Menos que 30 minutos por dia   |
|  |  |  | De 30 minutos a 1 hora por dia |
|  |  |  | De 1 hora a 2 horas por dia    |
|  |  |  | De 2 hora a 3 horas por dia    |
|  |  |  | De 3 horas ou mais por dia     |

23 Fazendo "Cooper" (trote ou corrida moderada)

|  |  |  |                                |
|--|--|--|--------------------------------|
|  |  |  | Nenhum                         |
|  |  |  | Menos que 30 minutos por dia   |
|  |  |  | De 30 minutos a 1 hora por dia |
|  |  |  | De 1 hora a 2 horas por dia    |
|  |  |  | De 2 hora a 3 horas por dia    |
|  |  |  | De 3 horas ou mais por dia     |

24 Na aula de exercício pré natal.

|  |  |  |                                |
|--|--|--|--------------------------------|
|  |  |  | Nenhum                         |
|  |  |  | Menos que 30 minutos por dia   |
|  |  |  | De 30 minutos a 1 hora por dia |
|  |  |  | De 1 hora a 2 horas por dia    |
|  |  |  | De 2 hora a 3 horas por dia    |
|  |  |  | De 3 horas ou mais por dia     |

25 Nadando

|  |  |  |                                |
|--|--|--|--------------------------------|
|  |  |  | Nenhum                         |
|  |  |  | Menos que 30 minutos por dia   |
|  |  |  | De 30 minutos a 1 hora por dia |
|  |  |  | De 1 hora a 2 horas por dia    |
|  |  |  | De 2 hora a 3 horas por dia    |
|  |  |  | De 3 horas ou mais por dia     |

26 Dançando

|  |  |  |                                |
|--|--|--|--------------------------------|
|  |  |  | Nenhum                         |
|  |  |  | Menos que 30 minutos por dia   |
|  |  |  | De 30 minutos a 1 hora por dia |
|  |  |  | De 1 hora a 2 horas por dia    |
|  |  |  | De 2 hora a 3 horas por dia    |
|  |  |  | De 3 horas ou mais por dia     |

Fazendo outras coisas por divertimento ou exercício? Por favor, relacionar as atividades:

27 \_\_\_\_\_  
nome da atividade

28 \_\_\_\_\_  
nome da atividade

|  |  |  |                                |
|--|--|--|--------------------------------|
|  |  |  | Nenhum                         |
|  |  |  | Menos que 30 minutos por dia   |
|  |  |  | De 30 minutos a 1 hora por dia |
|  |  |  | De 1 hora a 2 horas por dia    |
|  |  |  | De 2 hora a 3 horas por dia    |
|  |  |  | De 3 horas ou mais por dia     |

|  |  |  |                                |
|--|--|--|--------------------------------|
|  |  |  | Nenhum                         |
|  |  |  | Menos que 30 minutos por dia   |
|  |  |  | De 30 minutos a 1 hora por dia |
|  |  |  | De 1 hora a 2 horas por dia    |
|  |  |  | De 2 hora a 3 horas por dia    |
|  |  |  | De 3 horas ou mais por dia     |

Só preencha a próxima etapa se a gestante trabalha por salário, como voluntária ou se for estudante. Se for dona de casa, desempregada, ou incapacitada de trabalhar, você não precisa preencher essa etapa.

## No Trabalho....

Quanto tempo, você geralmente passa:

29 Sentada, trabalhando em sala de aula ou escritório.

|  |  |  |                                |
|--|--|--|--------------------------------|
|  |  |  | Nenhum                         |
|  |  |  | Menos que 30 minutos por dia   |
|  |  |  | De 30 minutos a 1 hora por dia |
|  |  |  | De 1 hora a 2 horas por dia    |
|  |  |  | De 2 hora a 3 horas por dia    |
|  |  |  | De 3 horas ou mais por dia     |

30 Em pé ou caminhando lentamente no trabalho, carregando objetos (mais pesado que uma garrafa refri 2L)

|  |  |  |                                |
|--|--|--|--------------------------------|
|  |  |  | Nenhum                         |
|  |  |  | Menos que 30 minutos por dia   |
|  |  |  | De 30 minutos a 1 hora por dia |
|  |  |  | De 1 hora a 2 horas por dia    |
|  |  |  | De 2 hora a 3 horas por dia    |
|  |  |  | De 3 horas ou mais por dia     |

31 Em pé ou caminhando lentamente no trabalho não carregando nada.

|  |  |  |                                |
|--|--|--|--------------------------------|
|  |  |  | Nenhum                         |
|  |  |  | Menos que 30 minutos por dia   |
|  |  |  | De 30 minutos a 1 hora por dia |
|  |  |  | De 1 hora a 2 horas por dia    |
|  |  |  | De 2 hora a 3 horas por dia    |
|  |  |  | De 3 horas ou mais por dia     |

32 Caminhando rapidamente no trabalho, carregando objetos (mais pesado do que uma garrafa de refrig. 2L)

|  |  |  |                                |
|--|--|--|--------------------------------|
|  |  |  | Nenhum                         |
|  |  |  | Menos que 30 minutos por dia   |
|  |  |  | De 30 minutos a 1 hora por dia |
|  |  |  | De 1 hora a 2 horas por dia    |
|  |  |  | De 2 hora a 3 horas por dia    |
|  |  |  | De 3 horas ou mais por dia     |

33 Caminhando rapidamente no trabalho, não carregando nada.

|  |  |  |                                |
|--|--|--|--------------------------------|
|  |  |  | Nenhum                         |
|  |  |  | Menos que 30 minutos por dia   |
|  |  |  | De 30 minutos a 1 hora por dia |
|  |  |  | De 1 hora a 2 horas por dia    |
|  |  |  | De 2 hora a 3 horas por dia    |
|  |  |  | De 3 horas ou mais por dia     |
