# Supplementary material for: Do the body mass index and the diagnosis of gestational diabetes mellitus influence the level of physical activity during pregnancy and postpartum?
Source: PubMed Central journal article supplement (PMC6688803; doi:10.1371/journal.pone.0220947), 2019-08-09
Supplement: pone.0220947.s003.pdf [file pone.0220947.s003.pdf]

Data de Aplicação: \_\_\_\_ / \_\_\_\_ / \_\_\_\_

## 1. Identificação

Nome da Participante: \_\_\_\_\_

Número do prontuário: \_\_\_\_\_

Endereço: \_\_\_\_\_

Telefones de contato: \_\_\_\_\_ e \_\_\_\_\_

## 2. Dados epidemiológicos

Idade: \_\_\_\_\_ anos

Etnia: ( 1 ) Branca ( 0 ) Não branca

Atividade Profissional: ( 1 ) do lar ; ( 2 ) trabalha fora; ( 3 ) estudante

Idade dos filhos (se tiver):

Estado Civil: casada ( 1 ) sim ( 0 ) não

Grau de escolaridade

( 0 ) Analfabeta

( 1 ) Ensino Fundamental Incompleto

( 2 ) Ensino Fundamental Completo

( 3 ) Ensino Médio Incompleto

( 4 ) Ensino Médio Completo

( 5 ) Superior Completo

Profissão:

CBO:

## Dados obstétricos

Idade Gestacional: \_\_\_\_\_ semanas \_\_\_\_\_ dias

Número de Gestações (incluindo a atual) : \_\_\_\_\_ Paridade: \_\_\_\_\_ Abortos: \_\_\_\_\_

Histórico Obstétrico Desfavorável? ( 1 ) sim ( 0 ) não

Gravidez Planejada? ( 1 ) sim ( 0 ) não

Possui antecedente psiquiátrico/ psicológico? ( 1 ) sim ( 0 ) não

Se sim, ainda faz acompanhamento? ( 1 ) sim ( 0 ) não

#### 4. Critério de Classificação Econômica Brasil (CCEB)

##### Dados de classificação

| <b>Itens de conforto</b>                                                                                                                          | <b>Não possui</b> | <b>1</b> | <b>2</b> | <b>3</b> | <b>4+</b> |
|---------------------------------------------------------------------------------------------------------------------------------------------------|-------------------|----------|----------|----------|-----------|
| Quantidade de automóveis de passeio exclusivamente para uso particular                                                                            |                   |          |          |          |           |
| Quantidade de empregados mensalistas, considerando apenas os que trabalham pelo menos cinco dias por semana                                       |                   |          |          |          |           |
| Quantidade de máquinas de lavar roupa, excluindo tanquinho                                                                                        |                   |          |          |          |           |
| Quantidade de banheiros                                                                                                                           |                   |          |          |          |           |
| DVD, incluindo qualquer dispositivo que leia DVD e desconsiderando DVD de automóvel                                                               |                   |          |          |          |           |
| Quantidade de geladeiras                                                                                                                          |                   |          |          |          |           |
| Quantidade de freezers independentes ou parte da geladeira duplex                                                                                 |                   |          |          |          |           |
| Quantidade de microcomputadores, considerando computadores de mesa, laptops, notebooks e netbooks e desconsiderando tablets, palms ou smartphones |                   |          |          |          |           |
| Quantidade de lavadora de louças                                                                                                                  |                   |          |          |          |           |
| Quantidade de fornos de micro-ondas                                                                                                               |                   |          |          |          |           |
| Quantidade de motocicletas, desconsiderando as usadas exclusivamente para uso profissional                                                        |                   |          |          |          |           |
| Quantidade de máquinas secadoras de roupas, considerando lava e seca                                                                              |                   |          |          |          |           |

##### A água proveniente deste domicílio é de:

|   |                            |
|---|----------------------------|
| 1 | Rede geral de distribuição |
| 2 | Poço ou nascente           |
| 3 | Outro meio                 |

##### Considerando o trecho da rua de seu domicílio, você diria que a rua é:

|   |                       |
|---|-----------------------|
| 1 | Asfaltada/Pavimentada |
| 2 | Terra/Cascalho        |

Qual é o grau de instrução do chefe da família? Considere como chefe da família a pessoa que contribui com a maior parte da renda do domicílio

| Nomenclatura atual                                | Nomenclatura anterior                 |
|---------------------------------------------------|---------------------------------------|
| Analfabeto/Fundamental I incompleto               | Analfabeto/Primário incompleto        |
| Fundamental I completo/ Fundamental II incompleto | Primário Completo/ Ginásio incompleto |
| Fundamental II completo/Médio incompleto          | Ginásio Completo/Colegial incompleto  |
| Médio completo/superior incompleto                | Colegial completo/Superior incompleto |
| Superior completo                                 | Superior completo                     |

Classificação final: \_\_\_\_\_
